# Supplementary material for: Effect of raising awareness of heath care workers about catheter-associated urinary tract infection in patients undergoing cesarean section in Mansoura university hospital. A quasi-experimental study
Source: Research Square preprint supplement (doi:10.21203/rs.3.rs-6373473/v1), 2025-05-08
Supplement: Supplementary file 1 [file c08030890de61e19f1b7560c.docx]

1. **There must be a medical reason to insert a catheter?**

- Yes.
- No.
- I don’t know.

1. **What is the correct sequence to insert a Catheter safely?**

- Preform hand hygiene – use sterile gloves - use antiseptic on the urethra – apply lubricant to the tip – insert the catheter.
- First Use antiseptic then directly insert the catheter.
- Apply lube to the tip of the catheter and the urethra – slowly insert the catheter.

1. **The urine collecting system must remain closed at all times?**

- Yes.
- No.
- I don’t know.

1. **When to remove a catheter?**

- After 1 week.
- After 1 month.
- When there is no longer medical indication.

1. **Choosing the right catheter size?**

- Using bigger than recommended size is safe.
- Using bigger than recommended size can cause trauma and lead to increased risk of UTI.
- 16 f sized catheter is recommended for adult female.

1. **How to maintain a catheter correctly?**

- Fixing the catheter in place is not important.
- The urinary bag should always be below level of the bladder.
- All patients should receive prophylactic antibiotic once catheter is inserted.

1. **How to drain a full urinary bag?**

- Drain the bag completely to prevent any bacterial activity.
- Urinary bags should be emptied every 3 h.
- You should let the bag be 100% full before draining it.

1. **How to use antiseptic on urethra?**

- Disinfect the area in the direction of the anus.
- Disinfect the area in circular movement.
- It is not important to disinfect the area before catheter insertion.
